# Supplementary material for: An eco-friendly in situ activatable antibiotic via cucurbit[8]uril-mediated supramolecular crosslinking of branched polyethylenimine
Source: Royal Society of Chemistry journal article supplement (doi:10.1039/c7cc02466e), 2017-01-01
Supplement: c7cc02466e1.pdf [file c7cc02466e1.pdf]

## Supplementary Information

### An Eco-friendly In-situ Activable Antibiotic via Cucurbit[8]uril-Mediated Supramolecular Crosslinking of Branched Polyethyleimine

Shengke Li,<sup>a,†</sup> Nan Jiang,<sup>b,†</sup> Wenxuan Zhao,<sup>a</sup> Yuan-Fu Ding,<sup>a,c</sup> Ying Zheng,<sup>a</sup> Lian-Hui Wang,<sup>c</sup> Jun Zheng,<sup>\*b</sup>  
and Ruibing Wang<sup>\*a</sup>

#### Experimental Section

**Materials.** CB[8] was prepared according to a literature report.<sup>1</sup> Boc-L-phenylalanine N-hydroxysuccinimide ester (Boc-Phe-OSu), and low M.W. PEI (800 Da) were purchased from Aladdin (Shanghai). All reagents and solvents were used as received without further purification.

**General procedure for the synthesis of PhePEI (800 Da).** To a solution of PEI (800 Da) (1.00 mmol, 800.00 mg) in DMF (10 mL), trimethylamine (n mmol) was added under ice-water bath conditions, subsequently Boc-L-phenylalanine N-hydroxysuccinimide ester (Boc-Phe-OSu, n mmol) was added. The reaction mixture was stirred at room temperature for 18 hours, followed by the removal of the solvents with a rotary evaporator. Subsequently, a solution of 4 N HCl in Dioxane (8 mL, v/v = 1) was added to the residue and stirred at room temperature for another 2 hours for the deprotection of N-Boc in phenylalanine. The solvent was removed and the crude product was dialyzed (500 Da) against water for 3 days before being lyophilized. The approximate grafting percentage of PEI was calculated by the integration of aromatic proton against that of the ethylene protons in the <sup>1</sup>H NMR spectra of the product (Figure S1).

**PhePEI-1.** n = 10%, yellow viscous oily liquid, grafting percentage 2.2% (relative to primary amino group), 9.9% (molar ratio to PEI);

**PhePEI-2.** n = 20%, light yellow viscous oily liquid, grafting percentage 3.9% (relative to primary amino group), 17.7% (molar ratio to PEI);

**PhePEI-3.** n = 40% light yellow viscous oily solid, grafting percentage 7.5% (relative to primary amino group), 33.9% (molar ratio to PEI);

### **Strains and growth conditions**

*Staphylococcus aureus* (ATCC 25904), *Pseudomonas aeruginosa* (PAO1), *Acinetobacter baumannii* (ATCC 17978) and *Escherichia coli* (DH5 $\alpha$ ) were used in this study. *P. pseudomonas*, *A.baumannii* and *E.coli* were grown at 37°C in Luria broth (LB) medium (10 g tryptone, 5 g yeast extract and 5 g NaCl per liter ). *S. aureus* was grown at 37 °C in Tryptic soy broth (TSB) medium (17g tryptone, 3g phytone, 5g NaCl, 2.5g glucose and 2.5g K<sub>2</sub>HPO<sub>4</sub> per liter). For the bacterial viability test, bacteria were cultured in 96-well microtiter plate containing 100  $\mu$ l fresh medium and different concentrations of complexes, each well as inoculum to a starting optical density at 600 nm of 0.05. Cell numbers were determined by plate counting after 18 h incubation.

### **Cell culture and MTT assay**

RAW 264.7 cell line was cultured in DMEM medium (Gibco) supplemented with 10% FBS (Gibco) and 1% penicillin–streptomycin (Gibco) in a humidified environment at 37 °C with 5% CO<sub>2</sub>. Cytotoxicity of PhePEI-3 in the absence and presence of CB[8] were tested by colorimetric 3-(4,5-dimethylthiazol-2-yl) 2,5-diphenyltetrazolium bromide (MTT) assay in vitro. Cells were plated in 96-well plates (1  $\times$  10<sup>4</sup> per well) and were allowed to attach overnight. The test compounds were added (0.1 mg/ml PhePEI-3, in the absence and in the presence of 20  $\mu$ M CB[8]), and the cells were incubated for 24 h at 37 °C. Following incubation, 5 mg/ml MTT solution was added to each well and incubated for 3 h. DMSO was then added to each well to dissolve the formazan crystals. The DMSO-dissolved formazan crystals were read immediately at 540 nm with a multiplate reader (SpectraMax M5 Microplate Reader, Molecular Devices, USA).

### **Zeta potential measurement**

*E. coli* cells (500 $\mu$ L, OD<sub>600</sub> =1) were centrifuged and resuspended in 500 $\mu$ L PBS containing PhePEI or PhePEI/CB[8] complex at room temperature for 30 min. For the disassembly group, AD was added into the buffer treated with PhePEI/CB[8] and incubated for 30 min. Bacterial cells were collected by centrifugation and then suspended in 1mL Milli-Q water. Membrane

potential was determined by the Malvern Zetasizer Nano ZS apparatus. All samples were performed with three biological replicates.

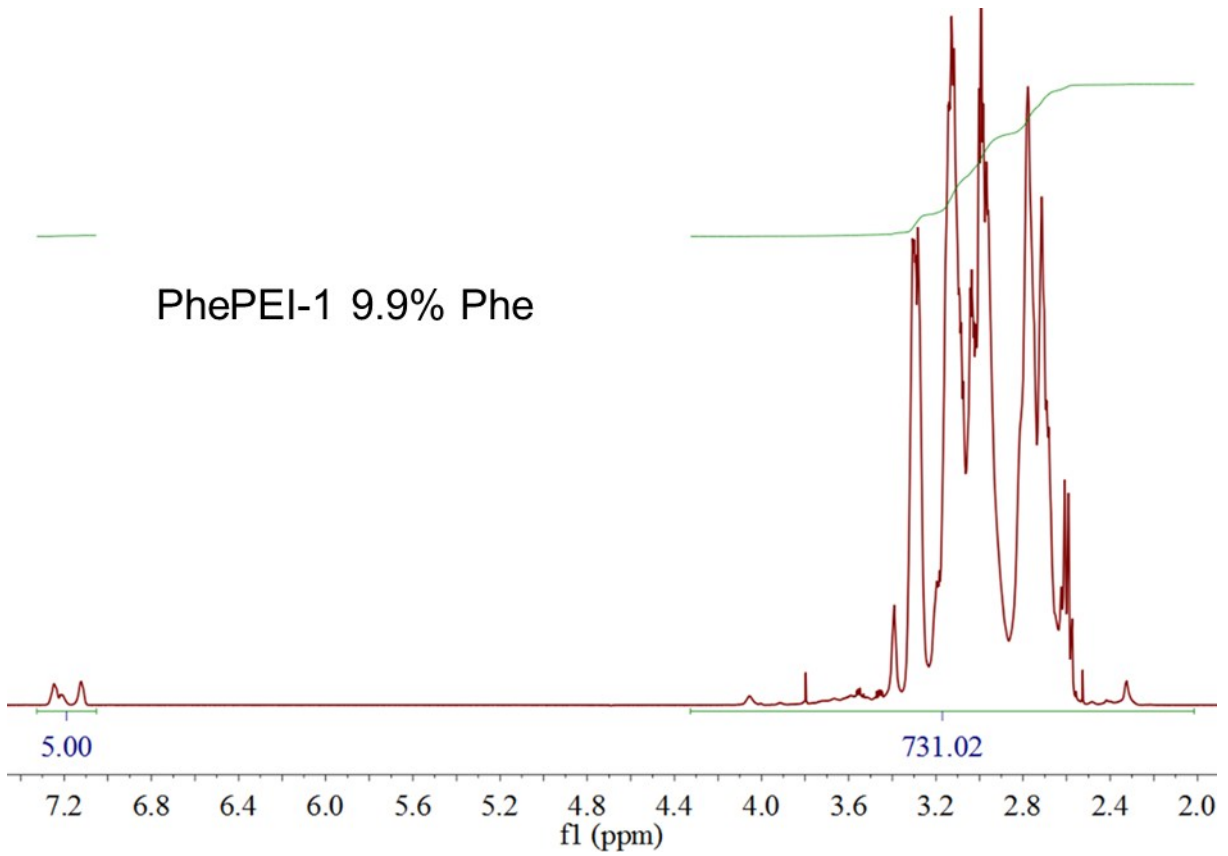

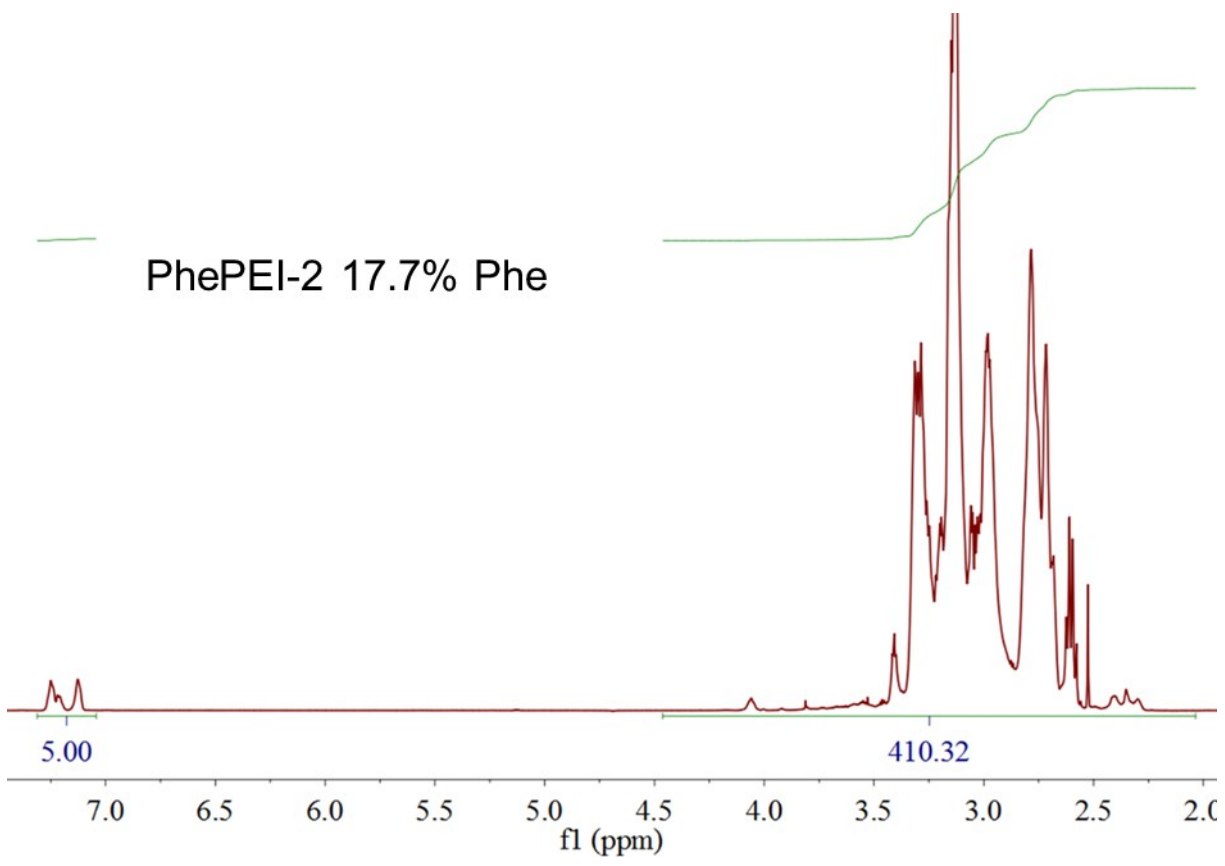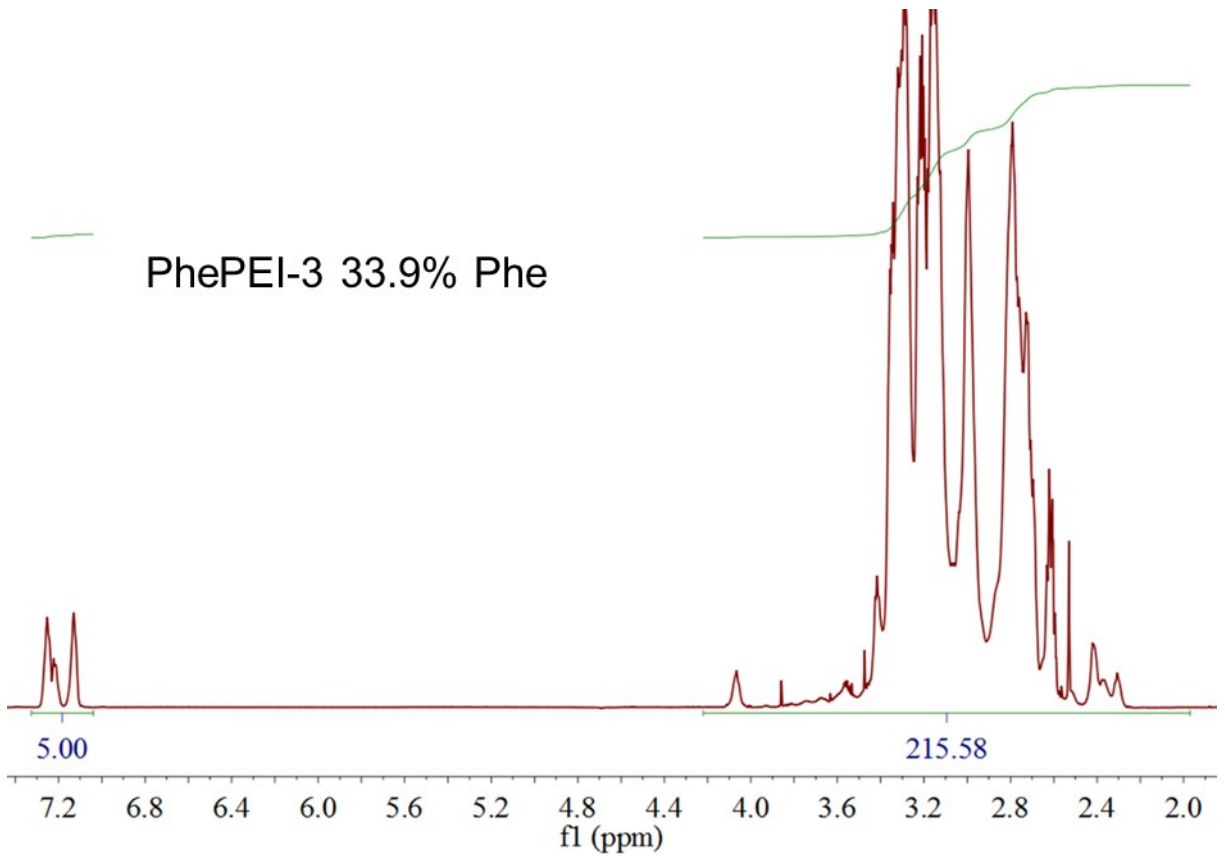

**Fig. S1**  $^1\text{H}$  NMR spectra of the prepared PhePEI in  $\text{D}_2\text{O}$  with various molar ratio to PEI as indicated.

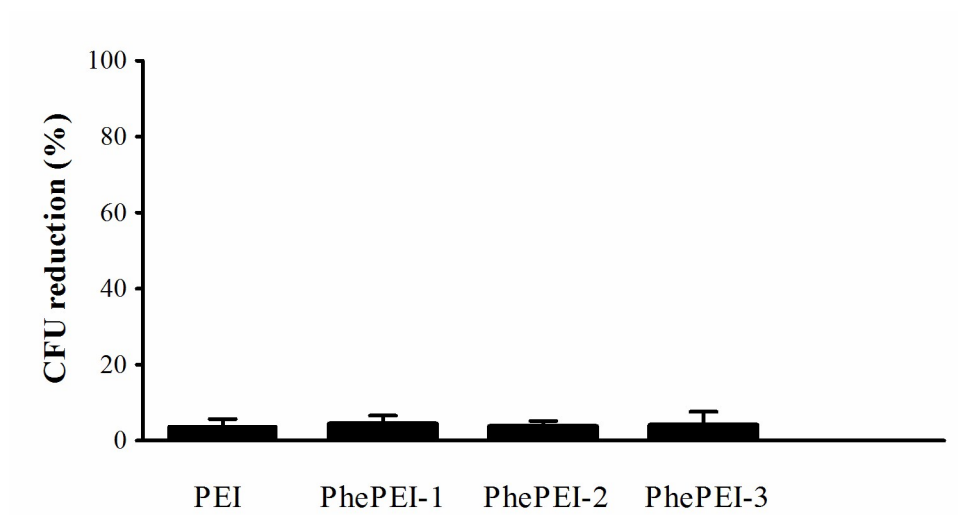

**Fig. S2** Antibacterial activity of PEI and PhePEI with different grafting percentage.

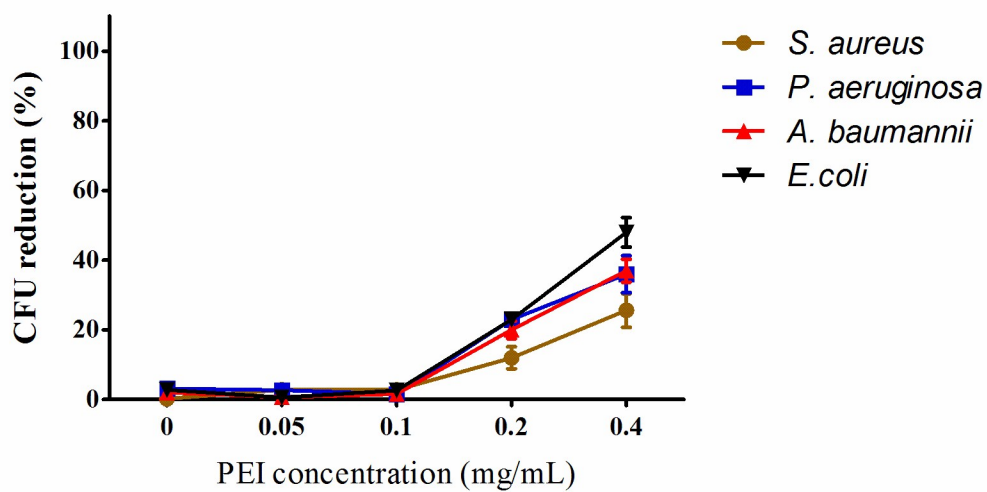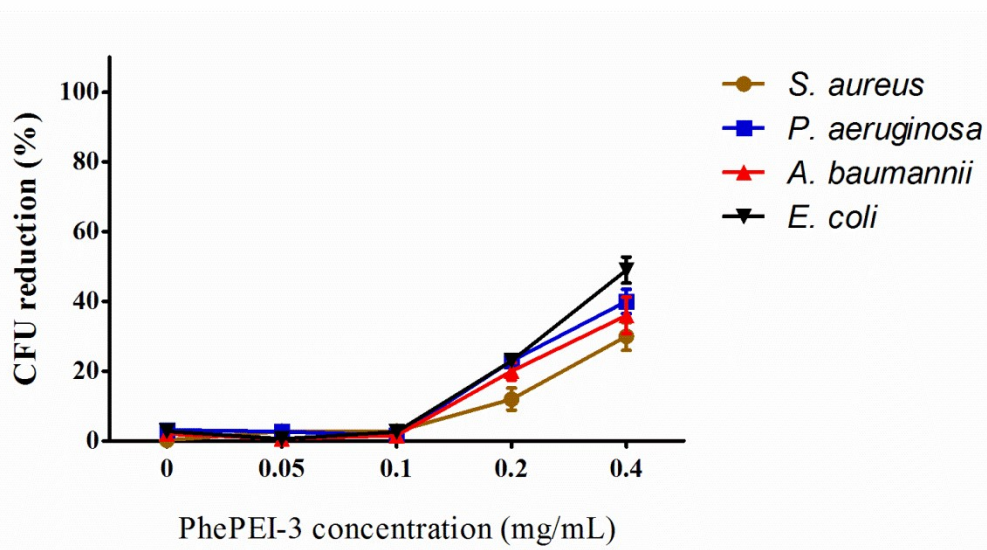

Fig. S3 Dose-dependent result of the antibacterial activity of PEI, and PhePEI-3.

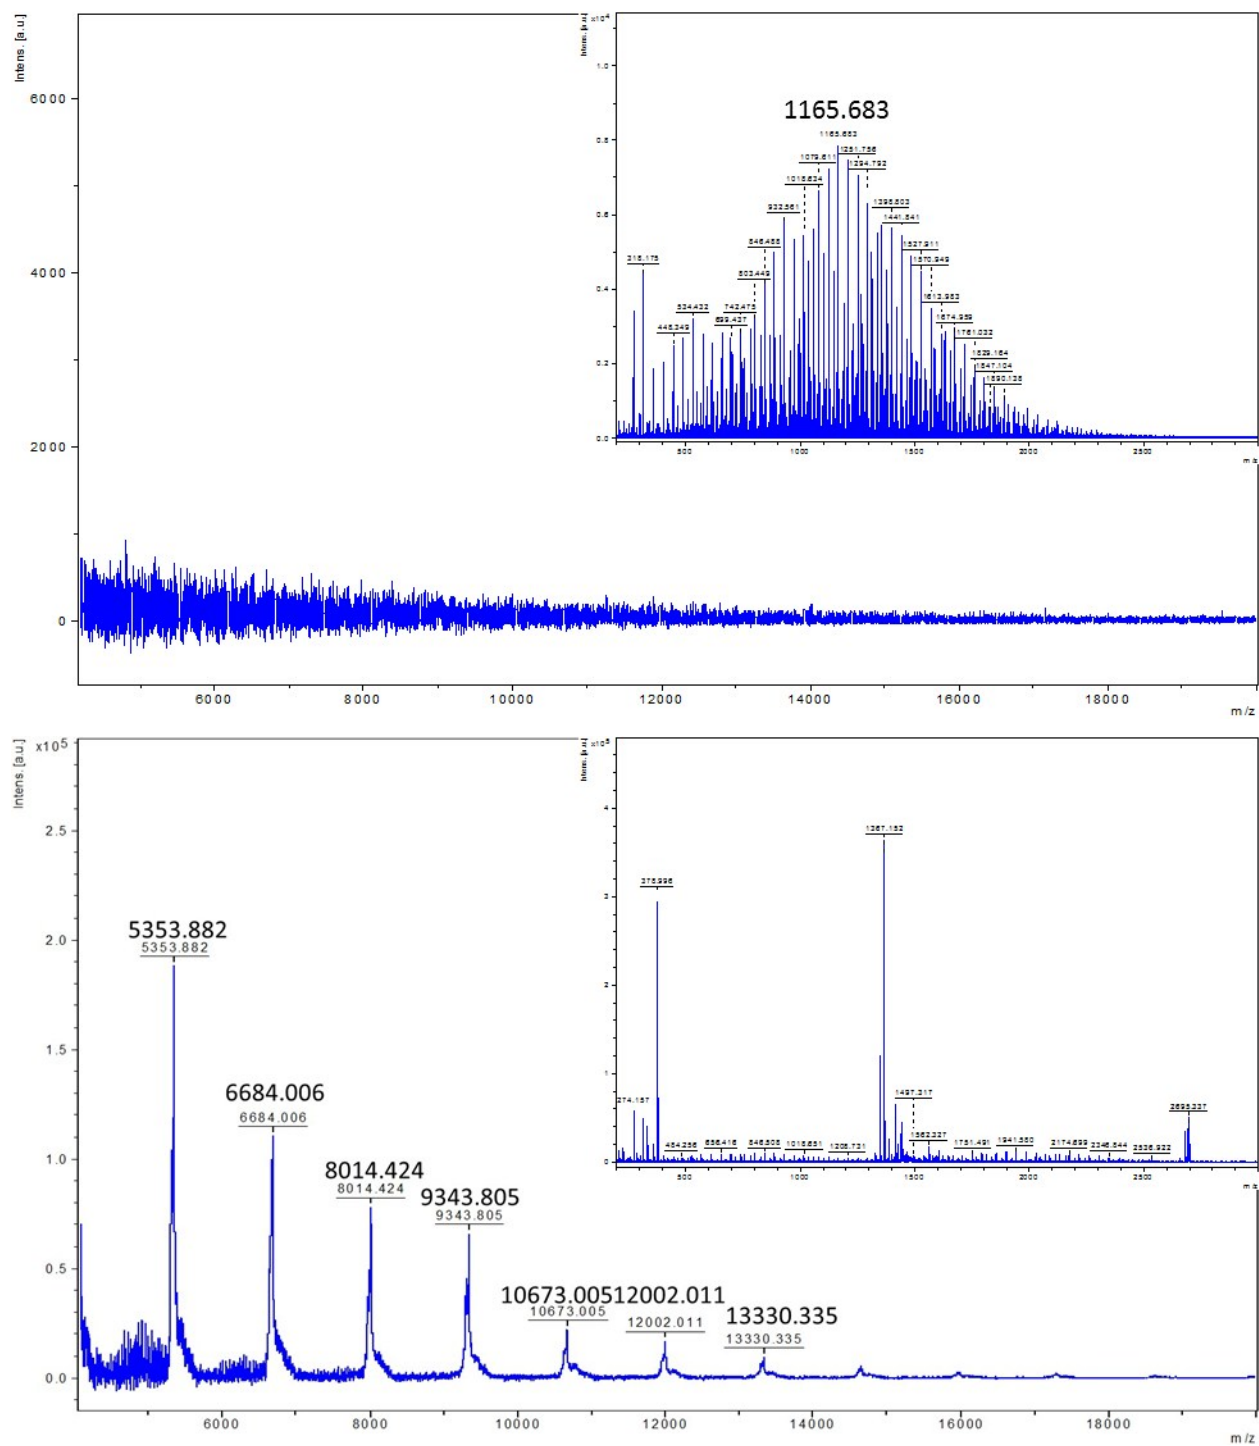

**Fig. S4** MALDI-TOF spectrum (BRUKER, CHCA as matrix, range 4000~20000, inset range 200~3500) of PhePEI-3 in the absence (top) and presence (bottom) of CB[8].

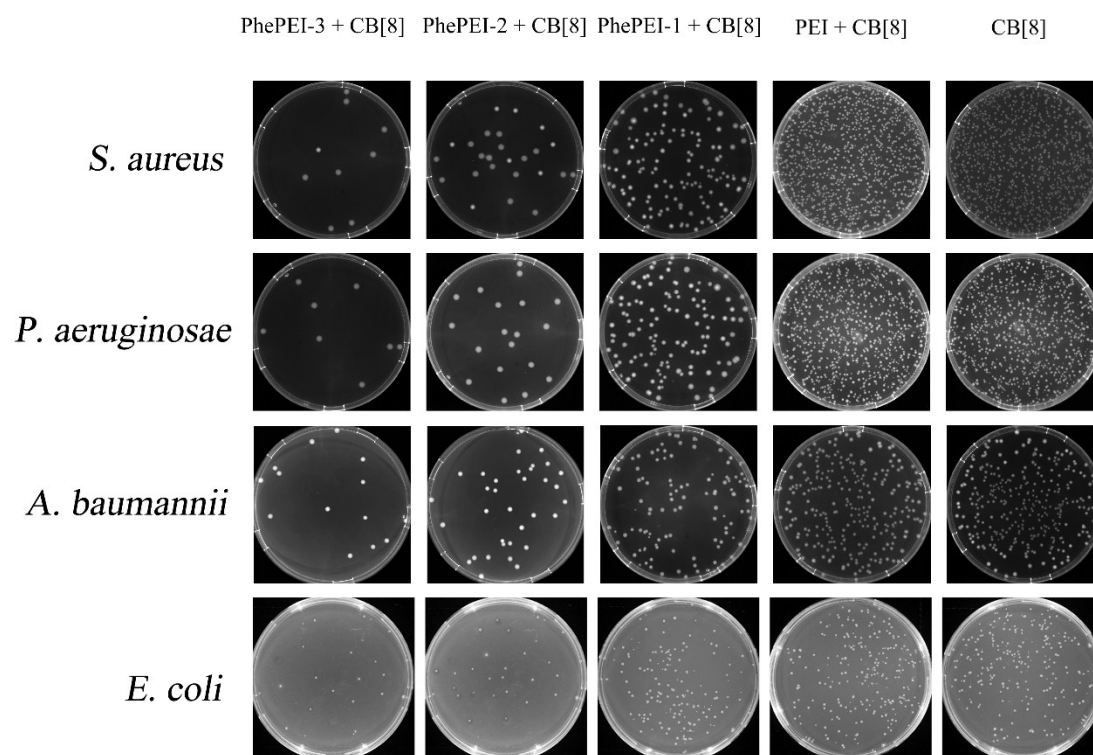

**Fig. S5** The associated CFU on LB agar plate for antibacterial activity study of PEI and PhePEI with different grafting percentages in the presence of 20  $\mu$ M CB[8].



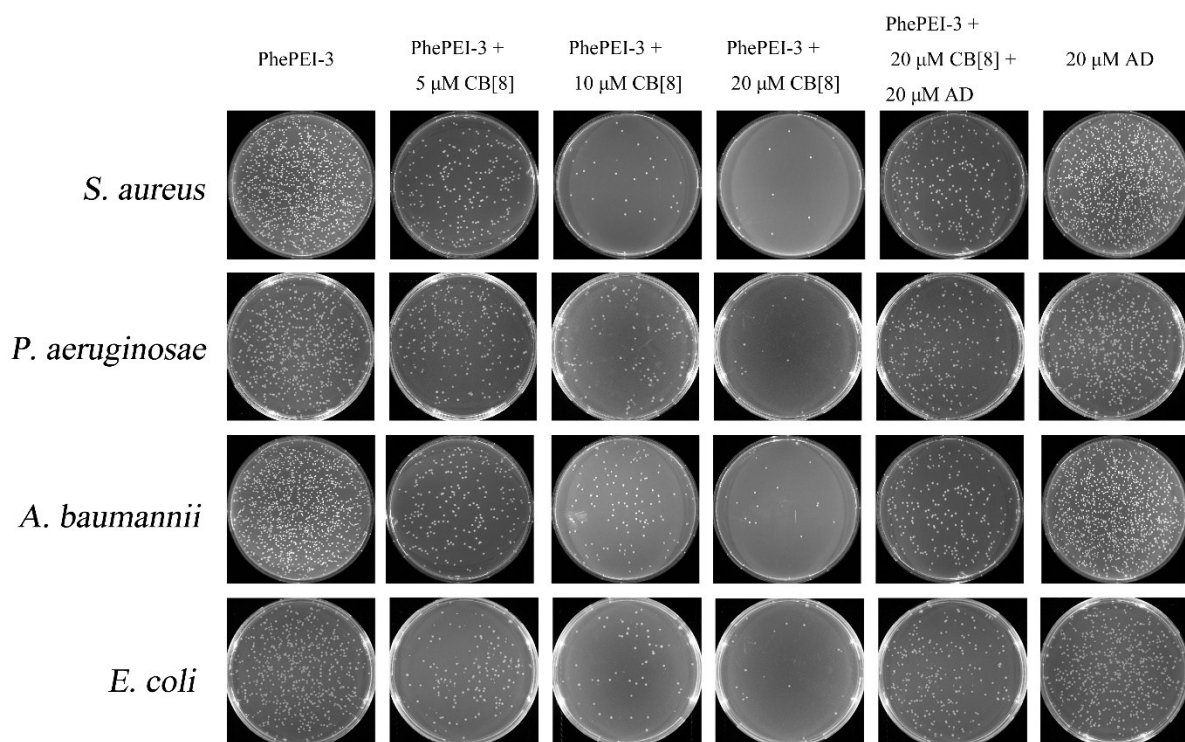

**Fig. S6** The associated CFU on LB agar plate for antibacterial activity study of PhePEI-3 upon addition of different amount of CB[8].

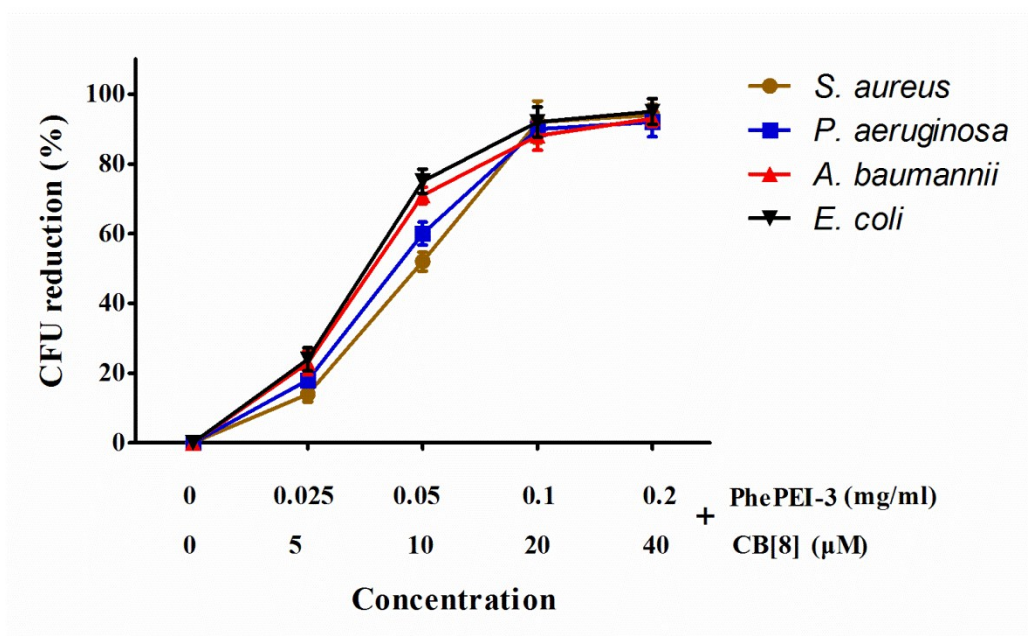

**Fig. S7** Dose-dependent result of the antibacterial activity of PhePEI-3 with CB[8].

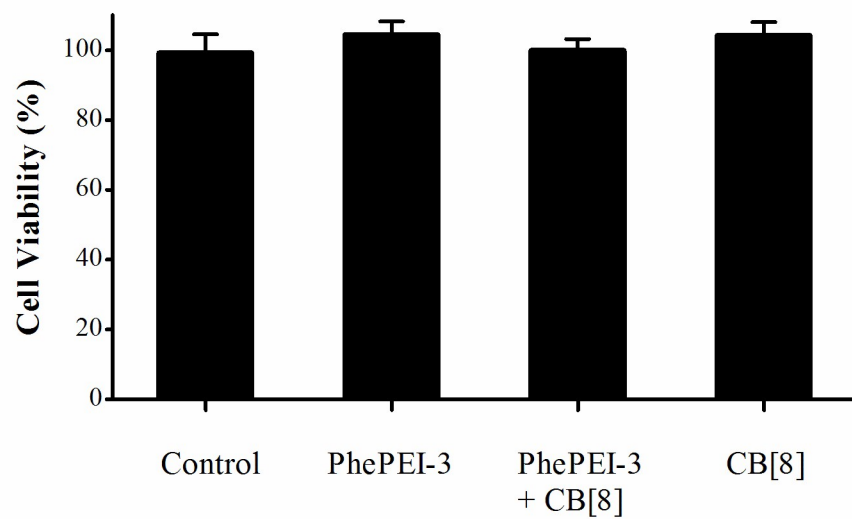

**Fig. S8** MTT assay of PhePEI-3 (0.1 mg/ml) in the presence and absence of CB[8] (20  $\mu$ M) by using RAW 264.7 cell line murine (macrophage from blood), 24h.

## Reference

- 1 A. Day, A. P. Arnold, R. J. Blanch and B. Snushall, *J. Org. Chem.*, 2001, **66**, 8094-8100.
